# Supplementary material for: Multifunctional perfluorocarbon nanoemulsions for 19F-based magnetic resonance and near-infrared optical imaging of dendritic cells
Source: Royal Society of Chemistry journal article supplement (doi:10.1039/b914006a), 2009-01-01
Supplement: b914006a.pdf [file b914006a.pdf]

## Electronic Supplementary Information (ESI)

### Multifunctional Perfluorocarbon Nanoemulsions for $^{19}\text{F}$ -based Magnetic Resonance and Near-Infrared Optical Imaging of Dendritic Cells

Yong Taik Lim, Young-Woock Noh, and Bong Hyun Chung\*

*BioNanotechnology Research Center, Korea Research Institute of Bioscience and Biotechnology, Daejeon 305-806, South Korea, Fax: (+82) 42-879-8594.*

**Preparation of IRDye800-coated PFOB nanoemulsions.** To fabricate perfluorooctylbromide (PFOB, Aldrich, St. Louis, MO)] nanoemulsions, PFOB liquids were emulsified in an aqueous solution using surfactant mixtures. A surfactant mixture comprising of 64 mol % lecithin (L- $\alpha$ -Phosphatidylcholine 95%, chicken egg, Avanti Polar Lipids, Alabaster, AL), 35 mol % cholesterol (Avanti Polar Lipids, Alabaster, AL) and 1 mol % 1,2-distearoyl-*sn*-glycero-3-phosphoethanolamine-N-[amino(polyethylene glycol)-2000] (ammonium salt) (DSPE-PEG(2000) Amine, Avanti Polar Lipids, Alabaster, AL) were dissolved in chloroform, and the organic solvent was evaporated using a rotary evaporator and a vacuum oven (50°C) for 24 h. After dispersing the surfactant mixture into sterilized distilled water, the solution was sonicated. PFOB liquids (40% v/v), glycerin (2.0% w/v), surfactant mixture and distilled water were mixed for 30 s using a homogenizer. The mixture was processed through an emulsifier (M-110S, Microfluidics, Newton, MA) at 20000 psi for 3 min. The fabricated PFOB nanoemulsions were stored at 4°C. As a near-infrared fluorophore, IRDye800 NHS ester was purchased from LI-COR Biosciences (Lincoln, Nebraska). For conjugation, an aliquot of PFOB nanoemulsion solutions were mixed with IRDye800 NHS ester (50  $\mu\text{L}/\text{mg}$ ) dissolved in water. The conjugation reaction was carried out for 2 hrs at 20 °C. IRDye800-coated PFOB nanoemulsions were separated using FPLC system.

**Characterization of IRDye800-coated PFOB nanoemulsions.** The mean particle diameters and zeta ( $\zeta$ )-potentials of the IRDye800-coated PFOB nanoemulsions were determined using a particle size analyzer (ELS-Z, Otsuka Electronics, Japan). The intensity autocorrelations were measured at a scattering angle ( $\theta$ ) of  $90^\circ$  with electrophoretic light scattering at  $25 \pm 0.1^\circ\text{C}$ . TEM images were obtained using a 200 kV Field Emission Transmission Electron Microscope (JEM-2100F, JEOL, LTD, Tokyo, Japan). IRDye800-coated PFOB nanoemulsions were also prepared as a thin liquid layer supported on a cryo-grid, and were immediately plunged in liquid ethane to prevent evaporation from the thinly spread sample. The frozen grids were stored in liquid nitrogen and transferred in a GATAN model 630 cryotransfer (Gatan, Inc., Warrendale, PA) in liquid nitrogen at a temperature of approximately  $-185^\circ\text{C}$ . Direct imaging was carried out using an acceleration voltage of 120 kV and a Multiscan 600W charge-coupled device (CCD) camera (Gatan, Inc, Pleasanton, CA) at a temperature of approximately  $-170^\circ\text{C}$ .

**Fluorescence and  $^{19}\text{F}$  MR spectroscopy of nanoemulsions.** The emission spectra of IRDye800-coated PFOB nanoemulsions were measured using a fluorescence spectrometer (LS 55, PerkinElmer Instruments, Wellesley, MA). All  $^{19}\text{F}$  spectral and imaging experiments of IRDye800-coated PFOB nanoemulsions were performed on a 600 MHz (14 T) Bruker NMR spectrometer (Avance DMX600, Bruker, Rheinstetten, Germany) equipped with a triple gradient system for microscopic imaging. The maximum gradient strength was 200 G/cm, and a 5 mm double-tuned  $^1\text{H}/^{19}\text{F}$  saddle-type RF coil was used. For  $^{19}\text{F}$  spectral measurement, IRDye800-coated PFOB nanoemulsions were inserted into standard Wilmad 5 mm NMR tubes, and fluorine spectra ( $30^\circ$  flip angle; 2 acquisitions; 5 sec acquisition time) were acquired from the sample.

***In Vitro* and *In Vivo* Fluorescence and  $^{19}\text{F}$  MR imaging of DCs.** DC2.4 cells (murine dendritic cells) were cultured in 10 mm dishes ( $1 \times 10^7$ /dish) in Dulbecco's modified Eagle Medium (DMEM; Gibco, Invitrogen, Carlsbad, CA) supplemented with 10% heatinactivated FBS, 50 IU/ml penicillin and 50  $\mu\text{g}/\text{ml}$  streptomycin. Cells were incubated with 0.63 ~ 100  $\mu\text{l}/\text{ml}$  IRDye800-coated PFOB nanoemulsions for 24 h. After incubation, labeling efficiency was analyzed by flow cytometry. For fluorescence imaging, DC2.4 were incubated with 50  $\mu\text{l}/\text{ml}$  IRDye800-coated PFOB nanoemulsions

for 24 h at 37 °C. After washing with PBS, the labeled cells were fixed with Cytofix/Cytoperm solution and stained with DAPI in PBS. To detect intracellular localization of nanoemulsions, DC2.4 cells were stained with the lysosomal marker, Lysosome-Associated Membrane Glycoprotein-1 (LAMP-1) by incubating with FITC-conjugated rat anti-LAMP-1 monoclonal antibody (1D4B) (BD PharMingen) for 30 min at room temperature. Fluorescence images were obtained on a Deltavision RT deconvolution microscope (Applied Precision Technologies, Issaquah, WA).

For *in vivo* fluorescence and MR imaging, DC2.4 ( $5 \times 10^6$  cells/ml) labeled with IRDye800-coated PFOB nanoemulsions were resuspended in 100  $\mu$ l HBSS buffer and were subcutaneously injected into a mouse. All experiments involving mice were performed in accordance with the Korean NIH guidelines for the care and use of laboratory research animals. The mice were anesthetized with 300  $\mu$ l of a 2.5% avertin solution (2,2,2-tribromoethanol-*tert*-amyl alcohol, Sigma). Thereafter fluorescence images (5 s exposure) were obtained home-made small animal imaging system using an excitation light source (760 nm) and an emission filter (845WB55). All images were processed with Simple PCI software (Compix Inc., Cranberry Township, PA).  $^{19}\text{F}$ -MR images of the mouse were performed with 4.7 T Bruker scanner (BioSpec, Rheinstetten, Germany) using a double-tuned  $^1\text{H}/^{19}\text{F}$  Birdcage coil design (outer/inner: 59/35 mm). For the  $^{19}\text{F}$ -MR image, the mouse was imaged with a gradient echo sequence (128  $\times$  128 matrix; 60  $\times$  60 mm<sup>2</sup> FOV; 50.0 ms TR; 2 ms TE; 5 mm slice thickness; 20 acquisitions).

**Cell viability assay.** Cell viability was measured by analyzing cleavage of thiazoyl blue tetrazolium bromide (MTT; Sigma) by succinate dehydrogenases of living cells to yield formazan. After incubating DC2.4 cells ( $1 \times 10^4$  cells/0.1 ml) with IRDye800-coated PFOB nanoemulsions for various times in flat-bottomed 96-well plates (Corning Costar, Cambridge, MA, USA), MTT (10  $\mu$ l/well of a 5 mg/ml MTT stock solution in PBS) was added directly to each well and plates were incubated at 37°C for 4 h. To assay MTT reduction colorimetrically, dimethyl sulfoxide (DMSO; Sigma) was added to solubilize formazan and absorbance was measured at 562 nm.

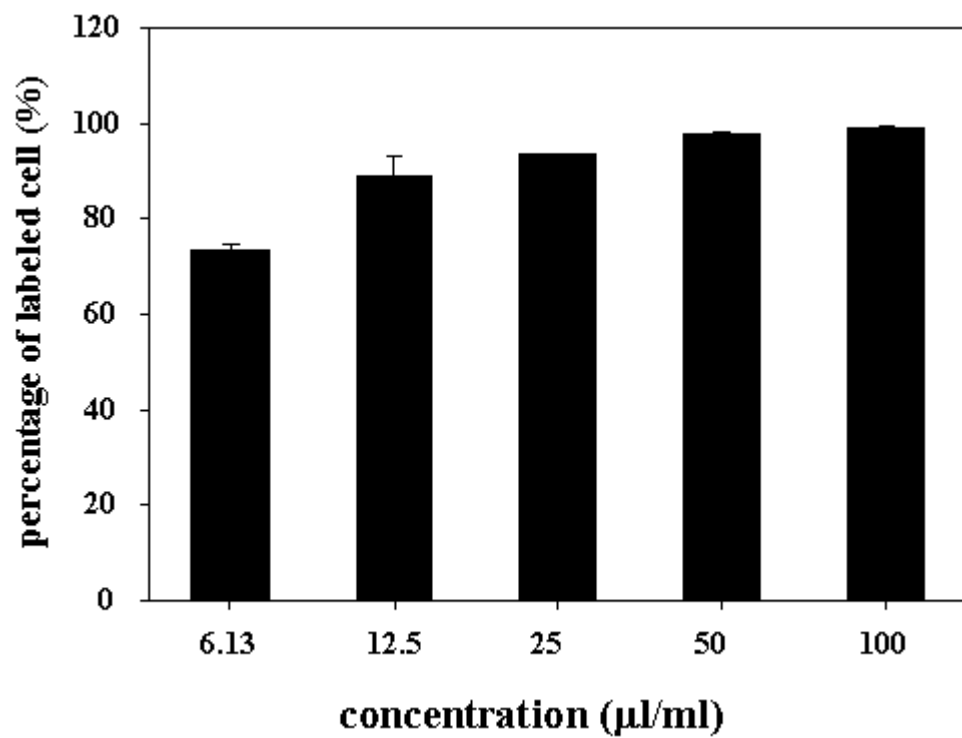

**Figure S1.** Labeling efficiency of dendritic cells labeled with IRDye800-coated PFOB nanoemulsions.

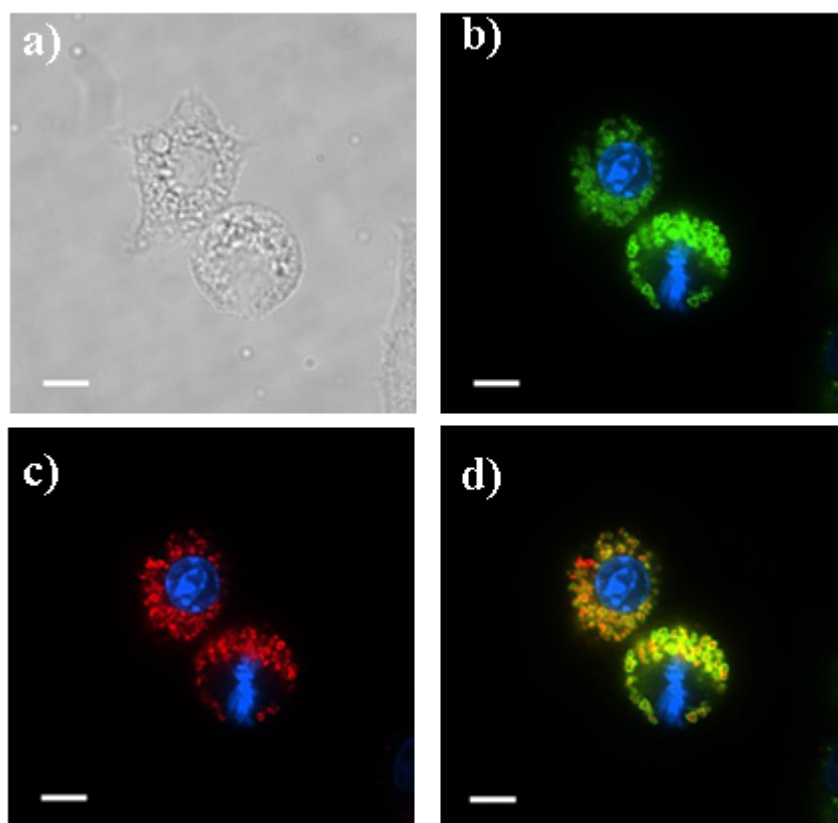

**Figure S2.** The localization of IRDye800-coated PFOB nanoemulsions within dendritic cells. (a) : DIC (differential interference contrast), (b) : FITC- anti-LAMP-1 stained (green; lysosome), (c) : IRDye800 (red), (d) merged. Scale bars : 10  $\mu\text{m}$ . Most of IRDye800-coated PFOB nanoemulsions were localized in the lysosomes.

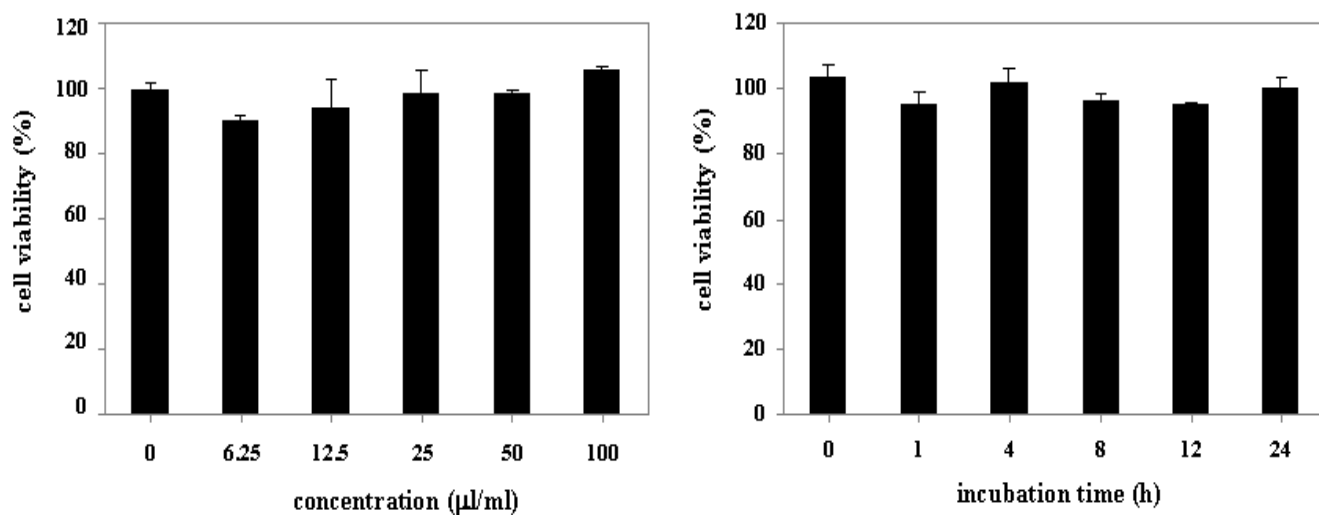

**Figure S3.** Viability of dendritic cells labeled with IRDye800-coated PFOB nanoemulsions
